# Supplementary material for: Costs of reproduction in a long-lived female primate: injury risk and wound healing
Source: Springer Nature journal article supplement (doi:10.1007/s00265-014-1729-4), 2014-04-21
Supplement: MOESM2 [file 265_2014_1729_moesm2_esm.docx]

**Supplementary Table 1.** Best supported GLMM predicting the monthly risk of injury in adult female baboons, modeling dominance rank using ordinal ranks.

| **fixed effects** | **β** | **SE** | **Z** | **P** |
| --- | --- | --- | --- | --- |
| Age | 0.051 | 0.011 | 4.462 | <0.0001 |
| Ordinal dominance rank | 0.109 | 0.035 | 3.120 | 0.0018 |
| Reproductive state (cycling vs. non-cycling) | 0.868 | 0.090 | 9.695 | <0.0001 |
| Fission period | 1.605 | 0.365 | 4.400 | <0.0001 |
| Group size (count of adult females) | 0.005 | 0.019 | 0.275 | 0.7835 |
| Ordinal rank x Group size | -0.004 | 0.002 | -2.464 | 0.0138 |

**Article title:** Costs of reproduction in a long-lived female primate: injury risk and wound healing

**Journal:** Behavioral Ecology and Sociobiology

**Authors:** Elizabeth A. Archie, Jeanne Altmann, Susan C. Alberts

**Corresponding Author:** Elizabeth A. Archie, Department of Biological Sciences, University of Notre Dame, 137 Gavin Hall, Notre Dame, IN 46556 USA, Tel. 574-631-0178, [earchie@nd.edu](mailto:earchie@nd.edu)
