# Supplementary material for: Costs of reproduction in a long-lived female primate: injury risk and wound healing
Source: Springer Nature journal article supplement (doi:10.1007/s00265-014-1729-4), 2014-04-21
Supplement: MOESM3 [file 265_2014_1729_moesm3_esm.docx]

**Supplementary Table 2.** GLMM predicting the monthly risk of injury in adult female baboons including only pregnant and lactating females, and excluding cycling females.

| **fixed effects** | **β** | **SE** | **Z** | **P** |
| --- | --- | --- | --- | --- |
| Age | 0.062 | 0.017 | 3.718 | 0.0002 |
| Proportional dominance rank | 0.666 | 0.256 | 2.602 | 0.0093 |
| Reproductive state (pregnant vs. lactating females) | 0.210 | 0.121 | 1.735 | 0.0828 |
| Fission period | 1.796 | 0.415 | 4.330 | <0.0001 |

**Article title:** Costs of reproduction in a long-lived female primate: injury risk and wound healing

**Journal:** Behavioral Ecology and Sociobiology

**Authors:** Elizabeth A. Archie, Jeanne Altmann, Susan C. Alberts

**Corresponding Author:** Elizabeth A. Archie, Department of Biological Sciences, University of Notre Dame, 137 Gavin Hall, Notre Dame, IN 46556 USA, Tel. 574-631-0178, [earchie@nd.edu](mailto:earchie@nd.edu)
